# Supplementary material for: Regulating the size and molecular weight of polymeric particles by 1,1-diphenylethene controlled soap-free emulsion polymerization
Source: Royal Society of Chemistry journal article supplement (doi:10.1039/c5ra17156c), 2015-01-01
Supplement: c5ra17156c1.pdf [file c5ra17156c1.pdf]

## Electronic Supplementary Information

### Regulating the Size and Molecular Weight of Polymeric Particles by 1,1-Diphenylethene Controlled Soap-Free Emulsion Polymerization

Xinlong Fan, Yin Liu, Xiangkun Jia, Shenqiang Wang, Chunmei Li, Baoliang Zhang, Hepeng Zhang, Qiuyu Zhang

Department of Applied Chemistry, School of Science, Northwestern Polytechnical University, No. 127, West Youyi Road, Xi'an 710072, Shaanxi, China

**Table S1** Detailed experimental conditions for the preparation of PS.

| Sample | S (g) | DPE<br>(g) | KPS<br>(g) | Water<br>(mL) |
|--------|-------|------------|------------|---------------|
| 1      | 0.5   | 0.03       | 0.05       | 100           |
| 2      | 1.0   | 0.03       | 0.05       | 100           |
| 3      | 3.0   | 0.03       | 0.05       | 100           |
| 4      | 5.0   | 0.03       | 0.05       | 100           |
| 5      | 7.0   | 0.03       | 0.05       | 100           |
| 6      | 3.0   | 0.05       | 0.08       | 100           |
| 7      | 3.0   | 0.07       | 0.12       | 100           |
| 8      | 3.0   | 0.09       | 0.15       | 100           |
| 9      | 0.5   | /          | 0.05       | 100           |
| 10     | 1.0   | /          | 0.05       | 100           |
| 11     | 3.0   | /          | 0.05       | 100           |
| 12     | 5.0   | /          | 0.05       | 100           |
| 13     | 7.0   | /          | 0.05       | 100           |
| 14     | 3.0   | /          | 0.08       | 100           |
| 15     | 3.0   | /          | 0.12       | 100           |
| 16     | 3.0   | /          | 0.15       | 100           |

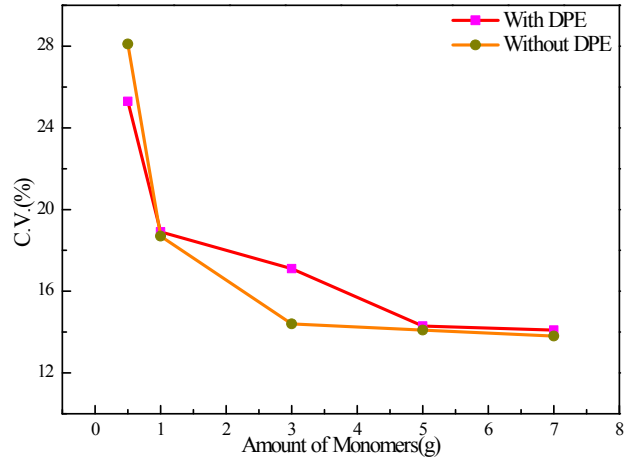

**Figure S1.** Coefficient of variation (C.V.) of PS particles produced with different amounts of monomer.

The C.V. was calculated by the following formula:

$$C.V. = \frac{\sigma}{\frac{\sum_i n_i d_i}{\sum_i n_i}} \times 100\% \quad (1)$$

$$\text{Where, } \sigma = \left\{ \frac{\sum_i \left[ d_i - \left( \frac{\sum_i n_i d_i}{\sum_i n_i} \right) \right]^2}{\sum_i n_i} \right\}^{\frac{1}{2}} \quad (2)$$

Where  $d_i$  is the diameter of the determined particle and  $n_i$  is the number of particles whose diameter is  $d_i$ .

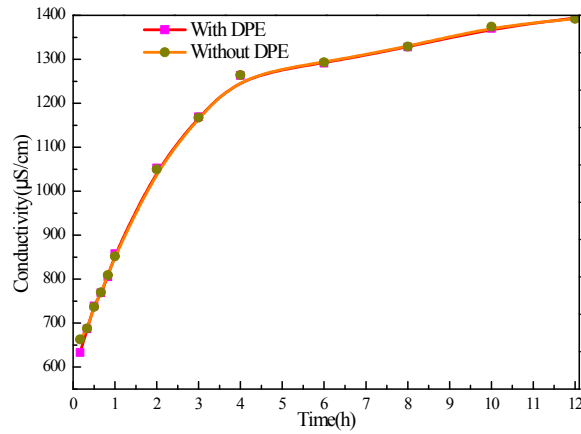

**Figure S2.** The conductivities of the soap-free emulsion in the presence and absence of DPE measured at different polymerization times.

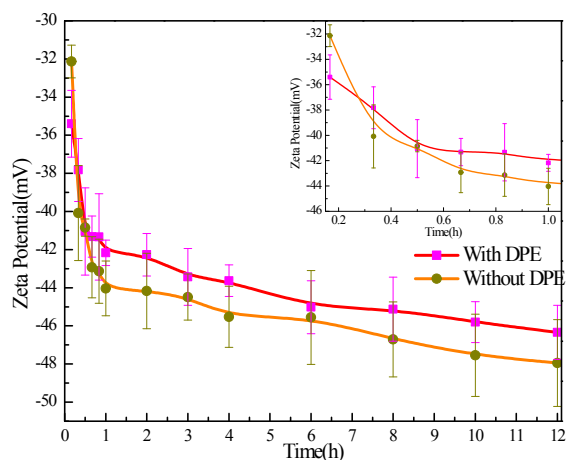

**Figure S3.** The zeta potentials of PS colloidal suspensions after dialysis to remove free movable ions.

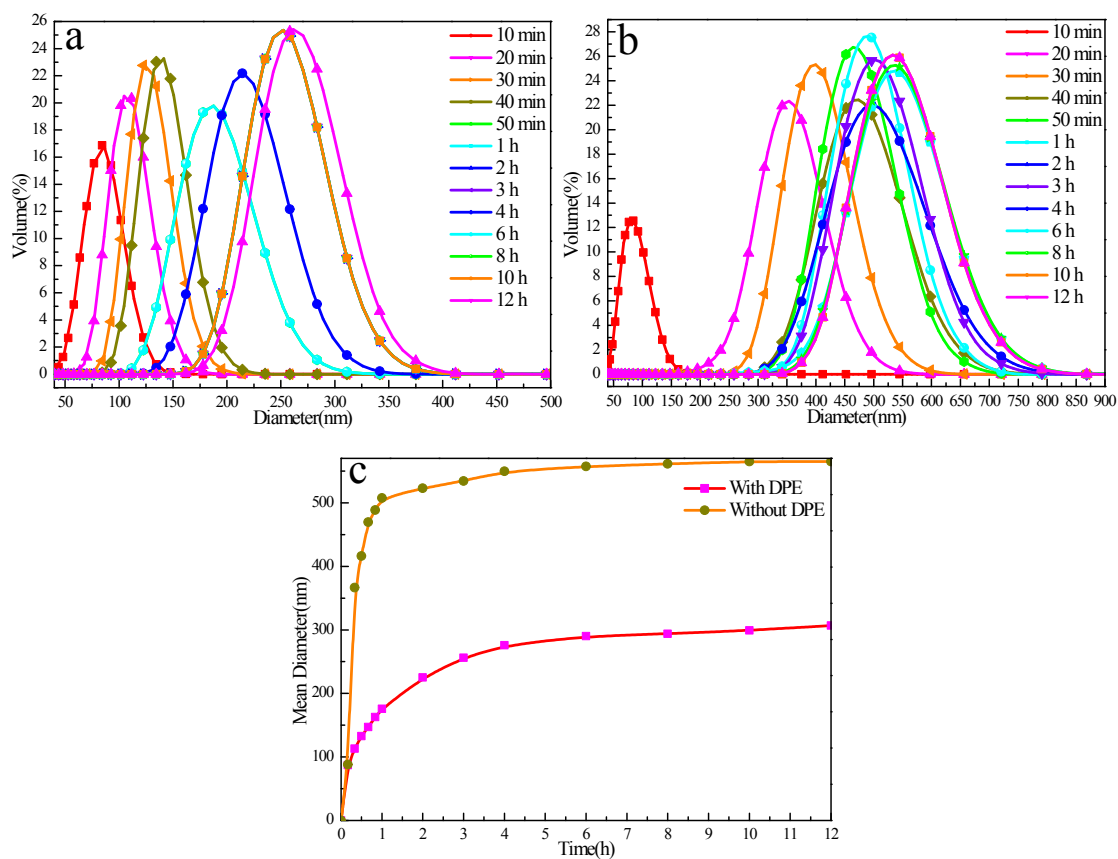

**Figure S4.** The size distributions of PS particles in the presence (a) and absence (b) of DPE at different polymerization time, the variation of mean diameter (c) of particles in the presence and absence of DPE.

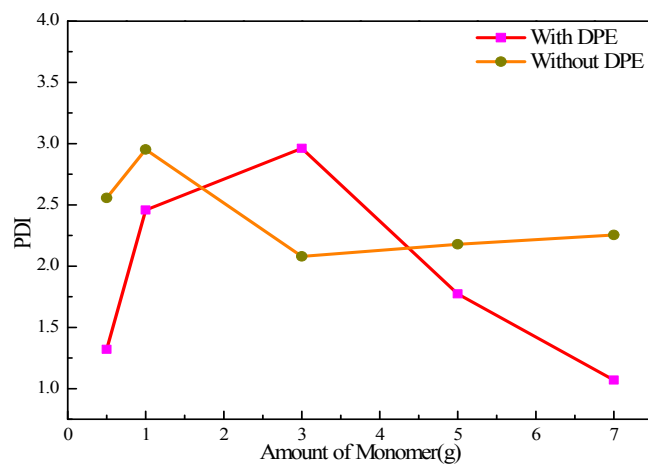

**Figure S5.** The PDIs of PS produced with different amounts of monomer.

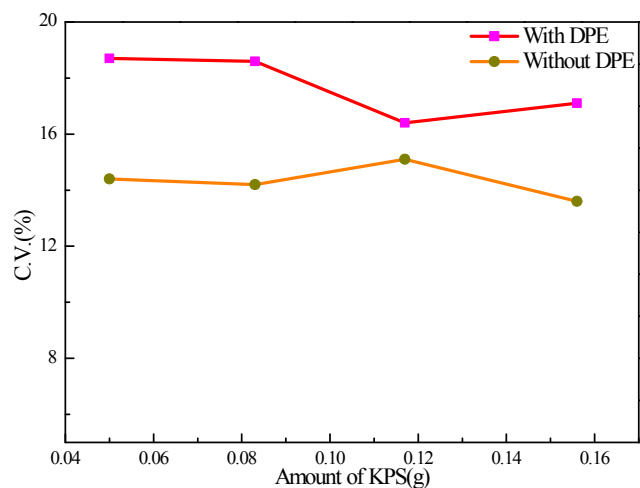

**Figure S6.** C.V. of PS particles produced with different amounts of KPS.

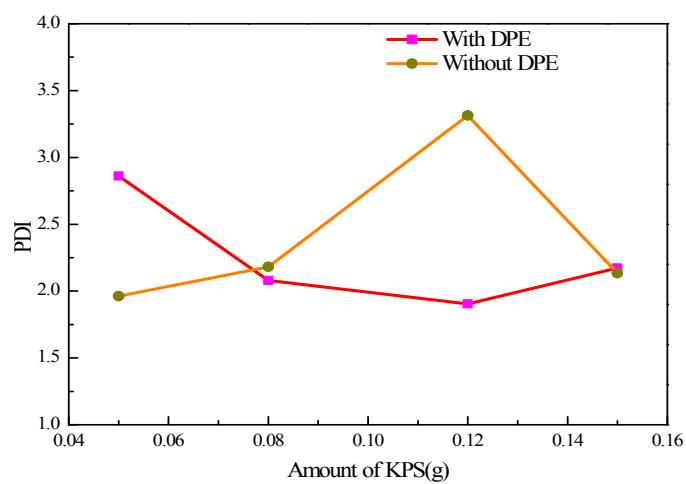

**Figure S7.** The PDIs of PS produced with different amounts of KPS.
